# Supplementary material for: Mesoporous silica nanoparticles/gelatin porous composite scaffolds with localized and sustained release of vancomycin for treatment of infected bone defects
Source: Royal Society of Chemistry journal article supplement (doi:10.1039/c7tb01246b), 2018-01-01
Supplement: c7tb01246b1.pdf [file c7tb01246b1.pdf]

## Supporting Information

### **Mesoporous silica nanoparticles/gelatin porous composite scaffolds with localized and sustained release of vancomycin for treatment of infected bone defects**

Xiaojun Zhou,<sup>‡a</sup> Weizong Weng,<sup>‡b</sup> Bo Chen,<sup>c</sup> Wei Feng,<sup>a</sup> Weizhong Wang,<sup>a</sup> Wei Nie,<sup>a</sup> Liang Chen,<sup>a</sup> Xiumei Mo,<sup>a</sup> Jiacan Su,<sup>\*b</sup> and Chuanglong He<sup>\*a</sup>

<sup>a</sup> College of Chemistry, Chemical Engineering and Biotechnology; State Key Laboratory for Modification of Chemical Fibers and Polymer Materials, Donghua University, Shanghai 201620, P. R. China

<sup>b</sup> Department of Orthopedics Trauma, Changhai Hospital, Second Military Medical University, Shanghai 200433, P. R. China

<sup>c</sup> Department of Radiology, Shanghai East Hospital, Tongji University School of Medicine, Shanghai 200120, P. R. China

<sup>‡</sup> These authors contributed equally to this paper

<sup>\*</sup> Corresponding author: Professor Chuanglong He, E-mail: hcl@dhu.edu.cn (C.L. He); Professor Jiacan Su, E-mail: dr\_sujiacan@163.com (J.C. Su).

## Supplementary experimental section

### Histological evaluation of animal model

Briefly, the collected radius samples were fixed in 4% paraformaldehyde overnight, decalcified in 10% EDTA, and embedded in paraffin. Then sagittal sections with 5  $\mu\text{m}$  were obtained using a microtome (EXAKT310, Germany). Thereafter, the sections were subjected to Gram staining for bacterial colonization assessment and Masson's trichrome staining for bone tissue morphology observation. In addition to the infected samples, the normal samples were also included for comparison.

### Supplementary figures

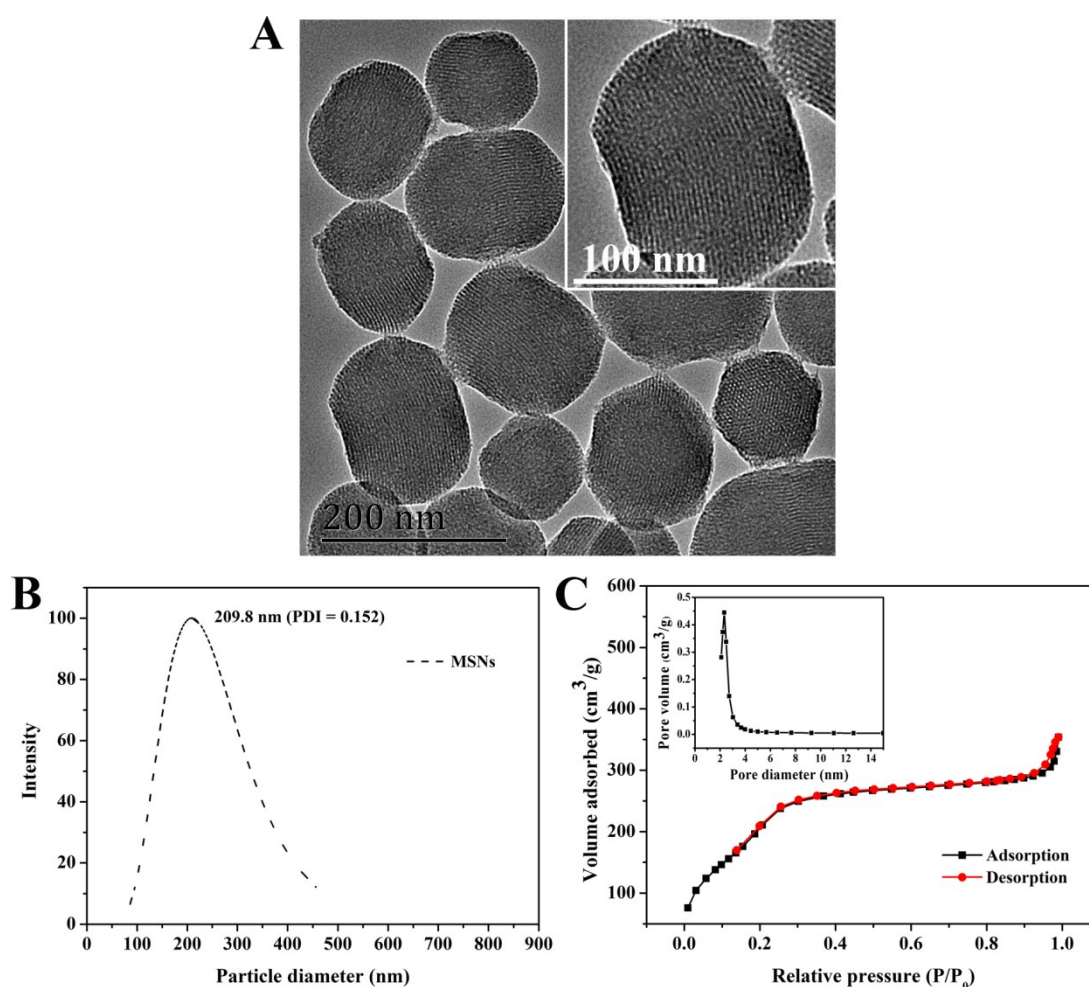

**Fig. S1** Characterization of prepared MSNs. (A) TEM image (inset is the magnified image), (B) size distribution and (C)  $\text{N}_2$  adsorption-desorption isotherms (inset is the pore size distribution).

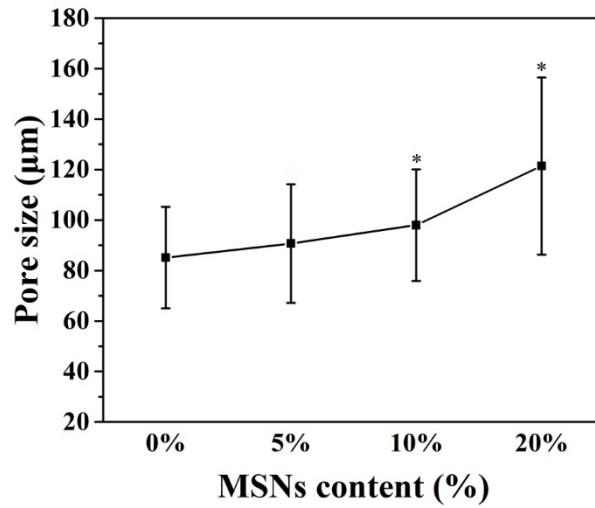

**Fig. S2** Effects of MSNs content on pore size of prepared scaffolds. The average pore size in each scaffold was determined using SEM images with Image J 1.34 software, where 100 measurements of the pores were randomly selected, \* $P < 0.05$  vs. pure Gelatin scaffold.

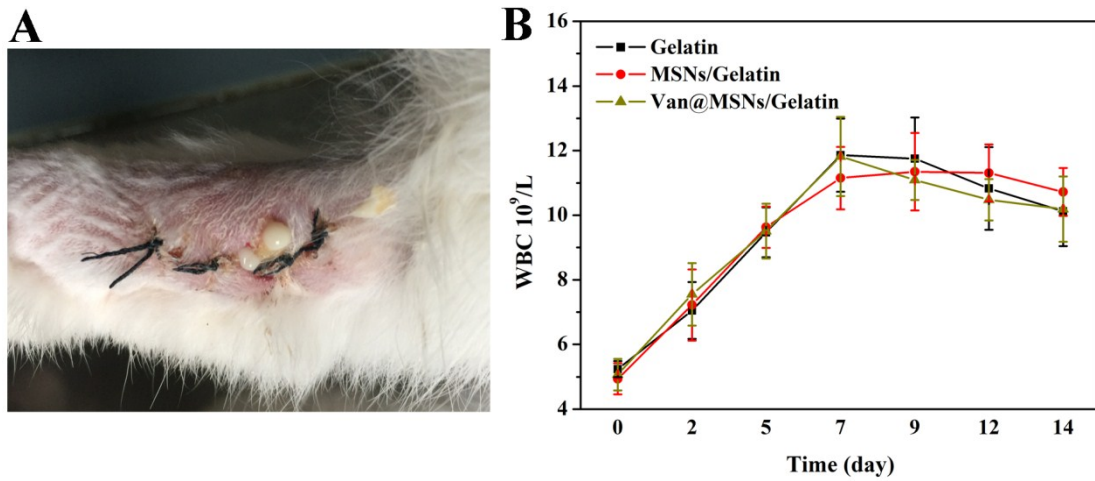

**Fig. S3** (A) Digital photo of operation area in rabbit after modelling surgery for 2 weeks and (B) WBC determination at different time points.

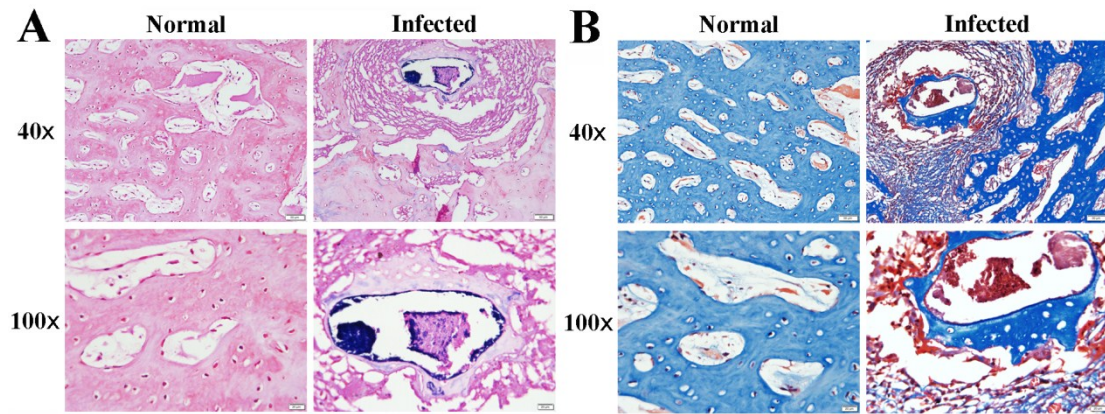

**Fig. S4** Histological evaluation of animal model establishment after 2 weeks: (A) Gram staining and (B) Masson's trichrome staining.

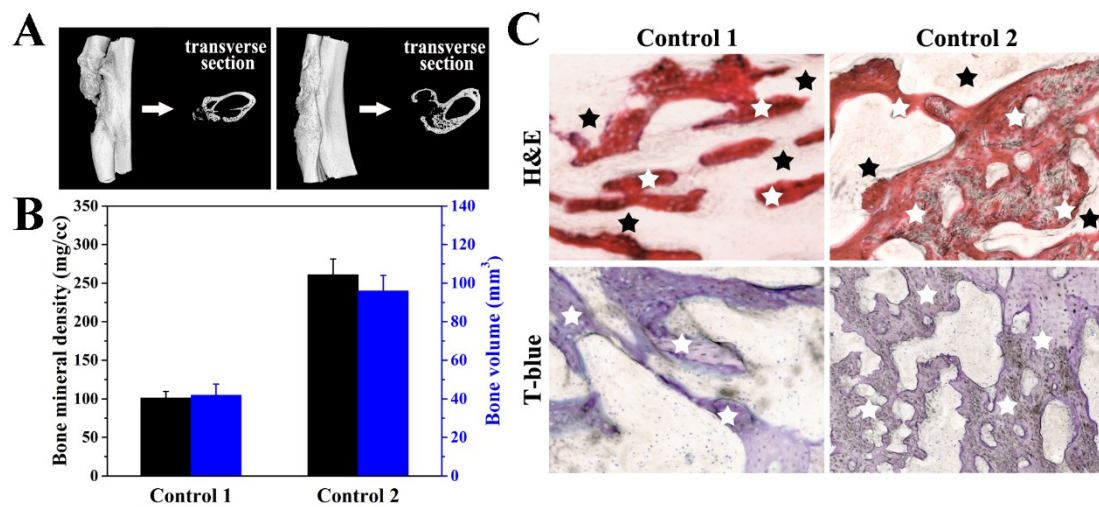

**Fig. S5** *In vivo* evaluation of Van groups at 12 weeks post-operation. (A) 3D micro-CT reconstructed images of rabbit radius. (B) Quantitative analysis of regenerated bone mineral density and bone volume. (C) H&E and T-blue staining. Black stars indicate the inflammatory cells and white stars indicate the newly formed bone.

**Table S1** Primer sequences used for PCR amplification.

| Gene  | Primer sequences                   | Product size |
|-------|------------------------------------|--------------|
| RUNX2 | Forward 5' ACGTACCCAGGCGTATTTC 3'  | 187 bp       |
|       | Reverse 5' GCTGGATAGTGCATTCGTGG 3' |              |
| OPN   | Forward 5' AGCCATGAGTCAAGTCAGCT 3' | 183 bp       |
|       | Reverse 5' ACTCGCCTGACTGTCGATAG 3' |              |
| OCN   | Forward 5' AATAGACTCCGCGCTACCTC 3' | 112 bp       |
|       | Reverse 5' GCTAGCTCGTCACAATTGGG 3' |              |
| GADPH | Forward 5' CAAGTTCAACGGCACAGTCA 3' | 102 bp       |
|       | Reverse 5' CCCCATTTGATGTTAGCGGG 3' |              |

**Table S2** Diameters of bacterial inhibition zone for different samples after 24 h incubation.

| Samples          | Outer diameter (mm) | Diameter difference between outer and inner diameter (mm) |
|------------------|---------------------|-----------------------------------------------------------|
| Gelatin          | —                   | —                                                         |
| MSNs/Gelatin     | —                   | —                                                         |
| Van@Gelatin      | $19.65 \pm 0.53$    | $9.60 \pm 0.43$                                           |
| Van@MSNs/Gelatin | $17.56 \pm 0.26$    | $7.22 \pm 0.22$                                           |

**Table S3** Diameters of bacterial inhibition zone for different samples at different release time periods.

| Release time | Samples          | Outer diameter (mm) | Diameter difference between outer and inner diameter (mm) |
|--------------|------------------|---------------------|-----------------------------------------------------------|
| 3 d          | Van@Gelatin      | $15.19 \pm 0.43$    | $5.17 \pm 0.46$                                           |
|              | Van@MSNs/Gelatin | $16.57 \pm 0.28$    | $6.59 \pm 0.29$                                           |
| 7 d          | Van@Gelatin      | $13.05 \pm 0.20$    | $3.22 \pm 0.10$                                           |
|              | Van@MSNs/Gelatin | $14.62 \pm 0.39$    | $4.64 \pm 0.39$                                           |
| 13 d         | Van@Gelatin      | $10.35 \pm 0.14$    | $0.56 \pm 0.18$                                           |
|              | Van@MSNs/Gelatin | $12.92 \pm 0.16$    | $3.11 \pm 0.13$                                           |
